# Supplementary material for: Chemical Constituents from Streblus taxoides Wood with Their Antibacterial and Antityrosinase Activities Plus in Silico Study
Source: MDPI journal article supplement (doi:10.3390/antibiotics12020319), 2023-02-03
Supplement: s1 [file s1]

### Supplementary Materials

**Table S1.** A list of isolated compounds obtained from *S. taxoides*, downloaded from the PubChem database.

| No. | Ligand                         | PubChem CID | Remark                   |
|-----|--------------------------------|-------------|--------------------------|
| 1   | Omega-Hydroxymoracin C         | -           | self-made from Moracin C |
| 2   | Moracin M                      | 185848      | -                        |
| 3   | Moracin C                      | 155248      | -                        |
| 4   | 3,3',4,5'-Tetrahydroxybibenzyl | 152444      | -                        |
| 5   | piceatannol                    | 667639      | -                        |

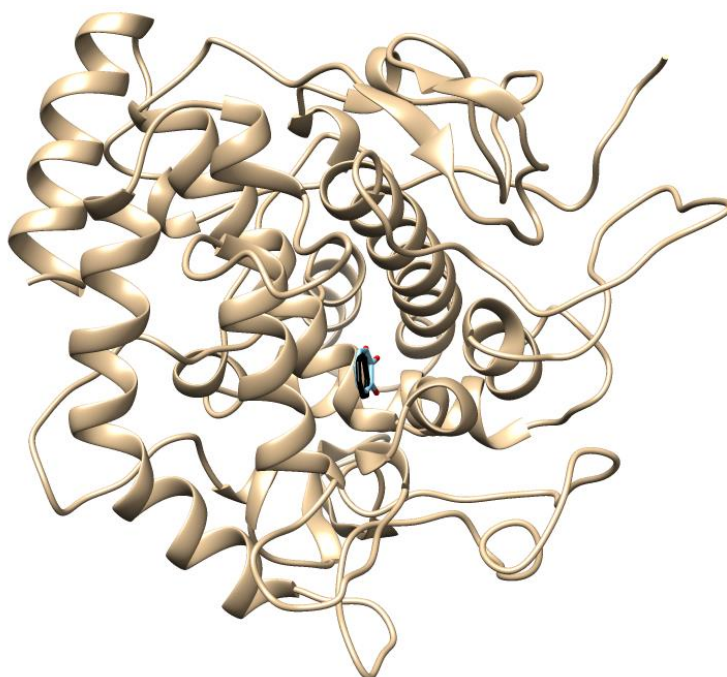

**Figure S1.** Docking protocol validation. Native tropolone structure (black color) locates in its original position. Re-docked tropolone (blue color) into its original pose overlays over native tropolone structure. The RMSD value of the re-docked tropolone is 1.038 Å.

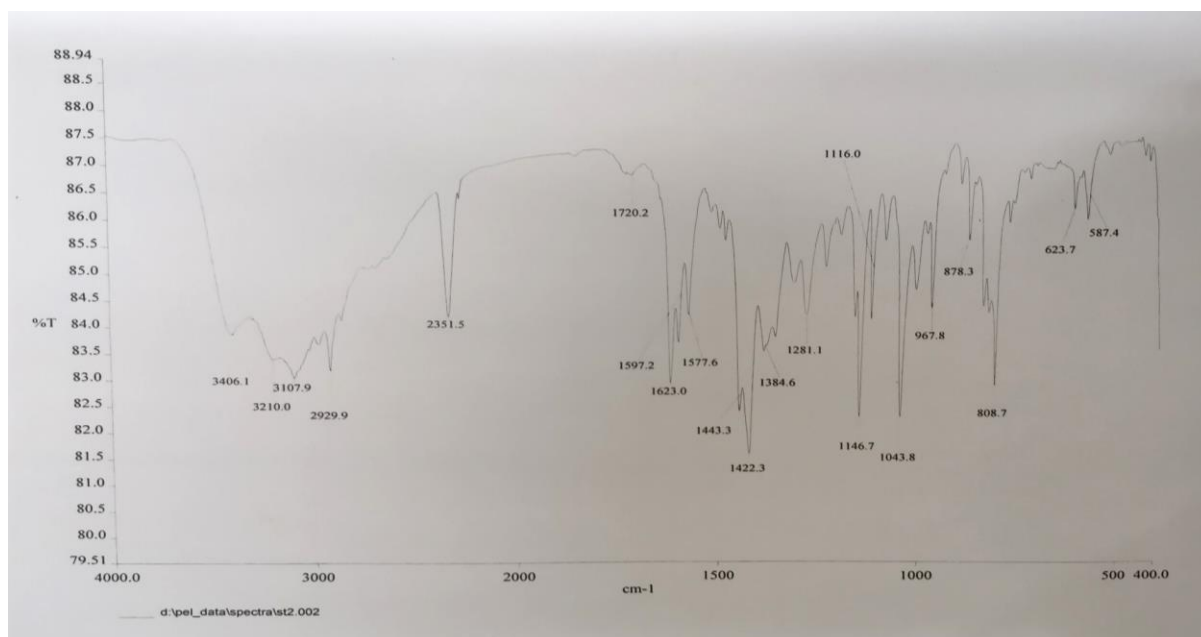

**Figure S2.** IR spectrum of  $\omega$ -hydroxymoracin C (KBr disc)

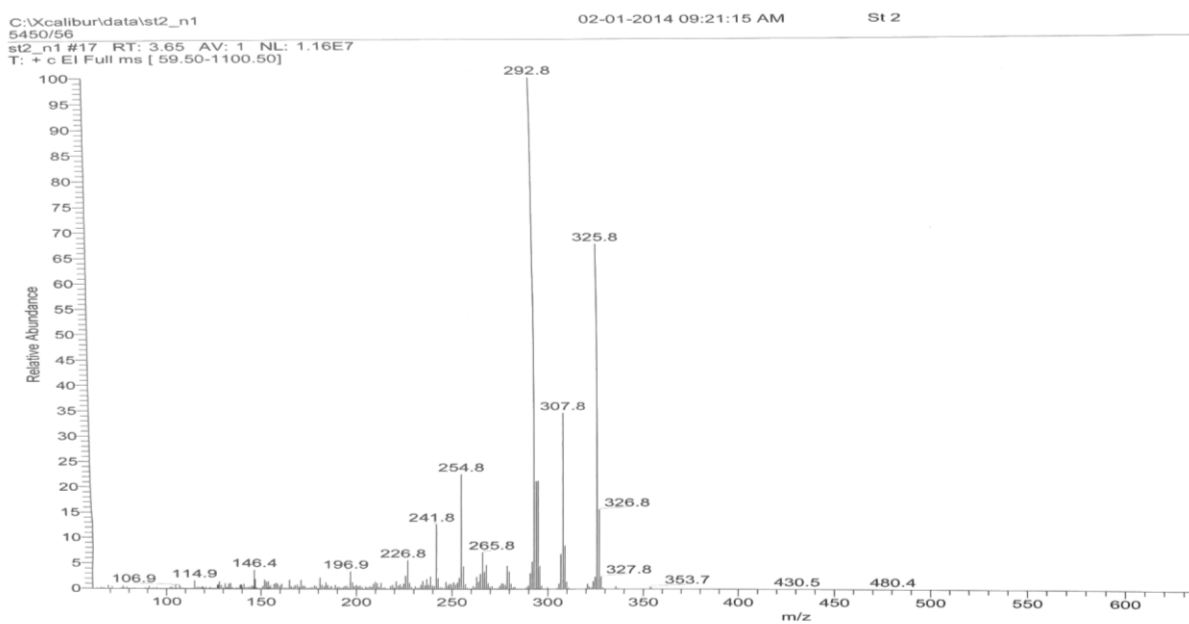

**Figure S3.** EI mass spectrum of  $\omega$ -hydroxymoracin C

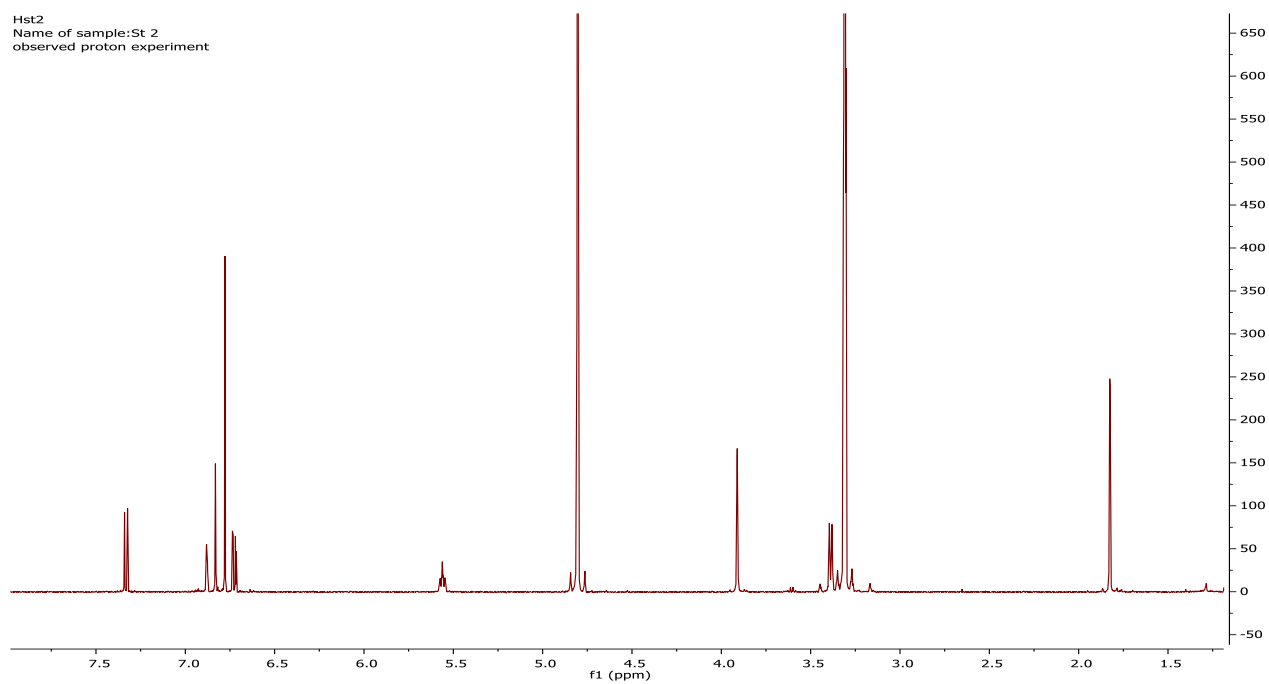

**Figure S4.** <sup>1</sup>H NMR spectrum of  $\omega$ -hydroxymoracin C

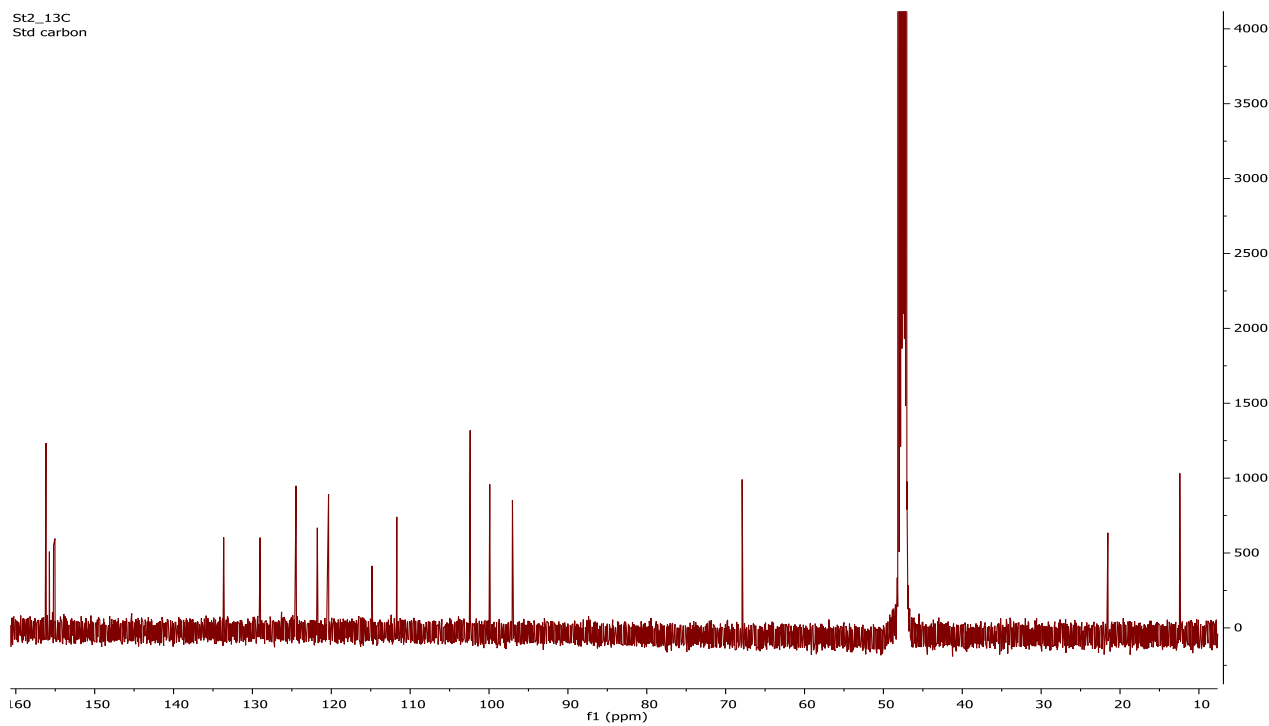

**Figure S5.** <sup>13</sup>C NMR spectrum of  $\omega$ -hydroxymoracin C

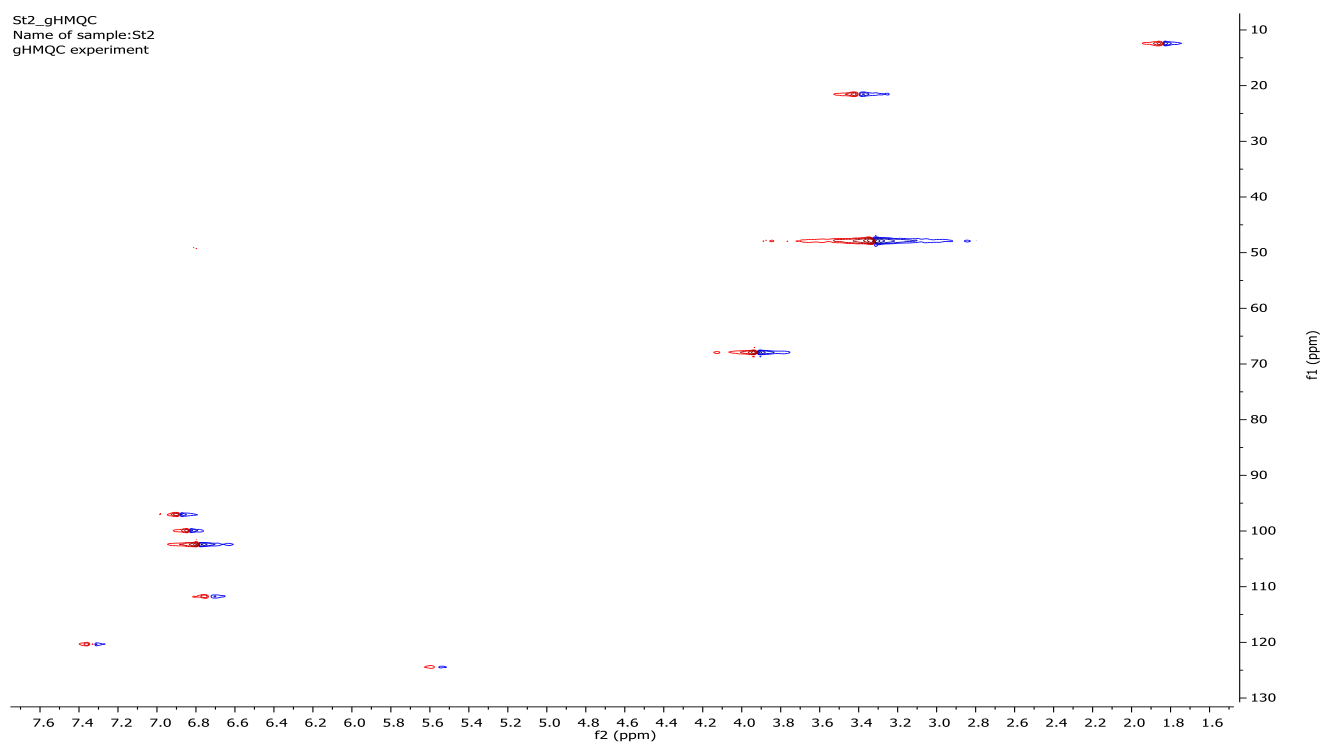

**Figure S6.** HMQC spectrum of  $\omega$ -hydroxymoracin C

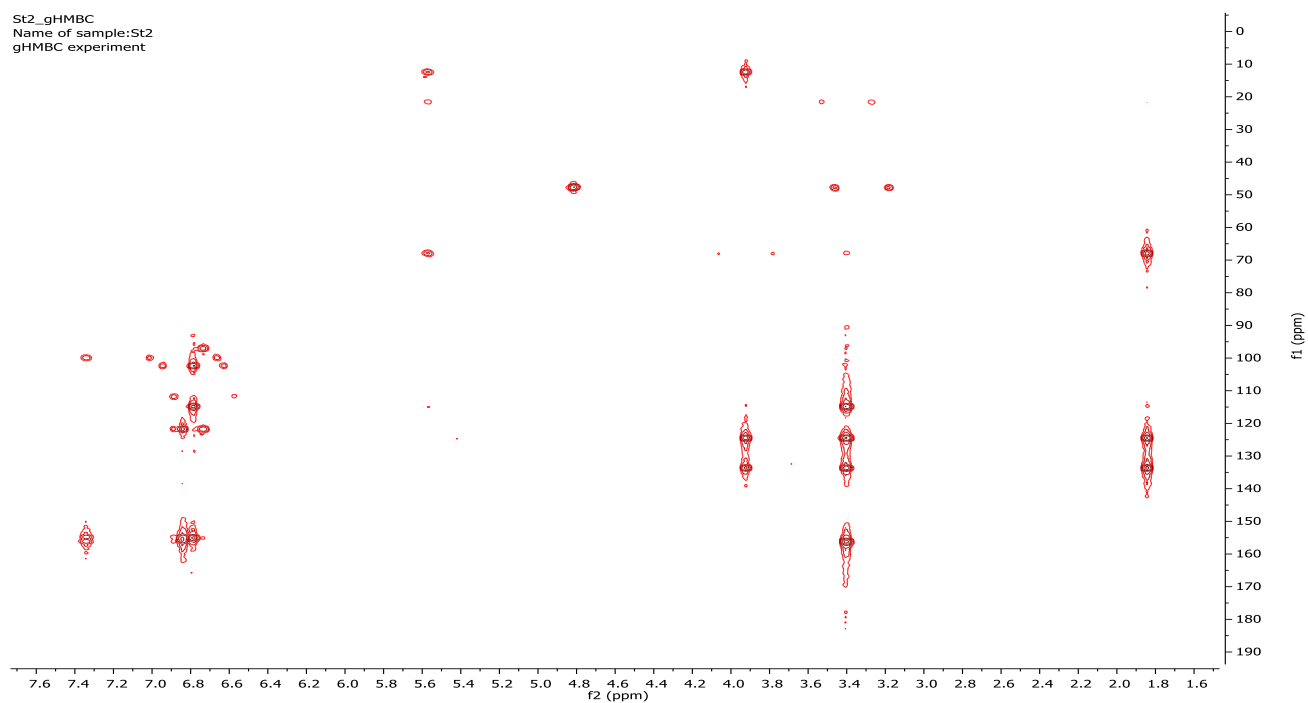

**Figure S7.** HMBC spectrum of  $\omega$ -hydroxymoracin C

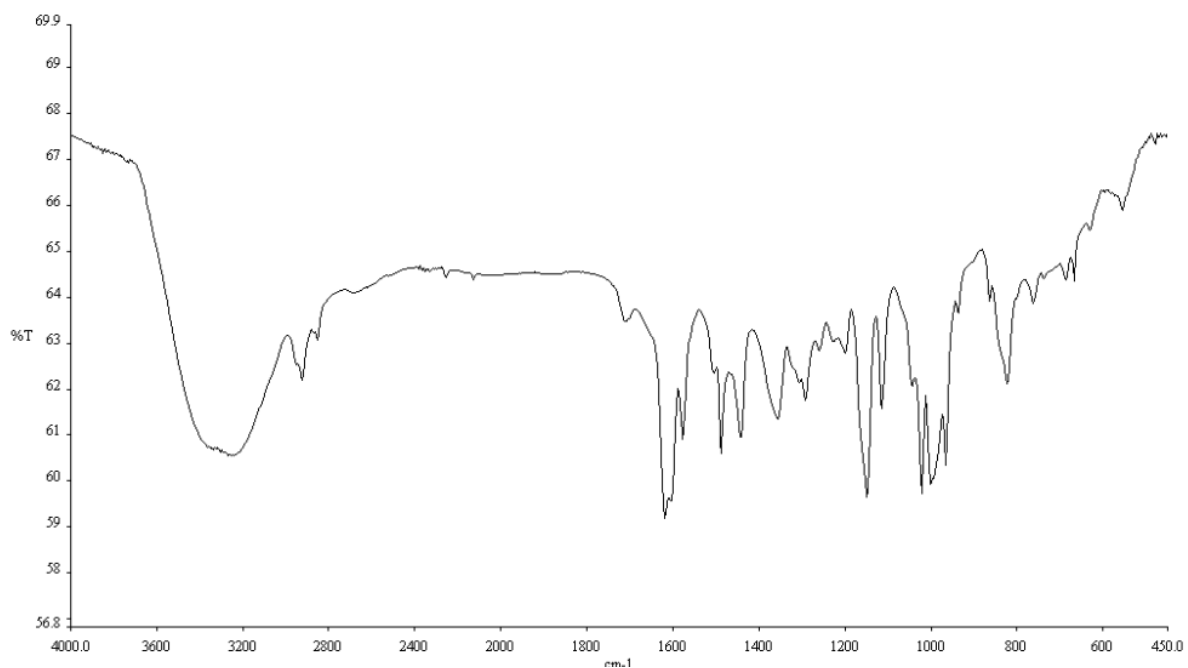

**Figure S8.** IR spectrum of moracin M (KBr disc)

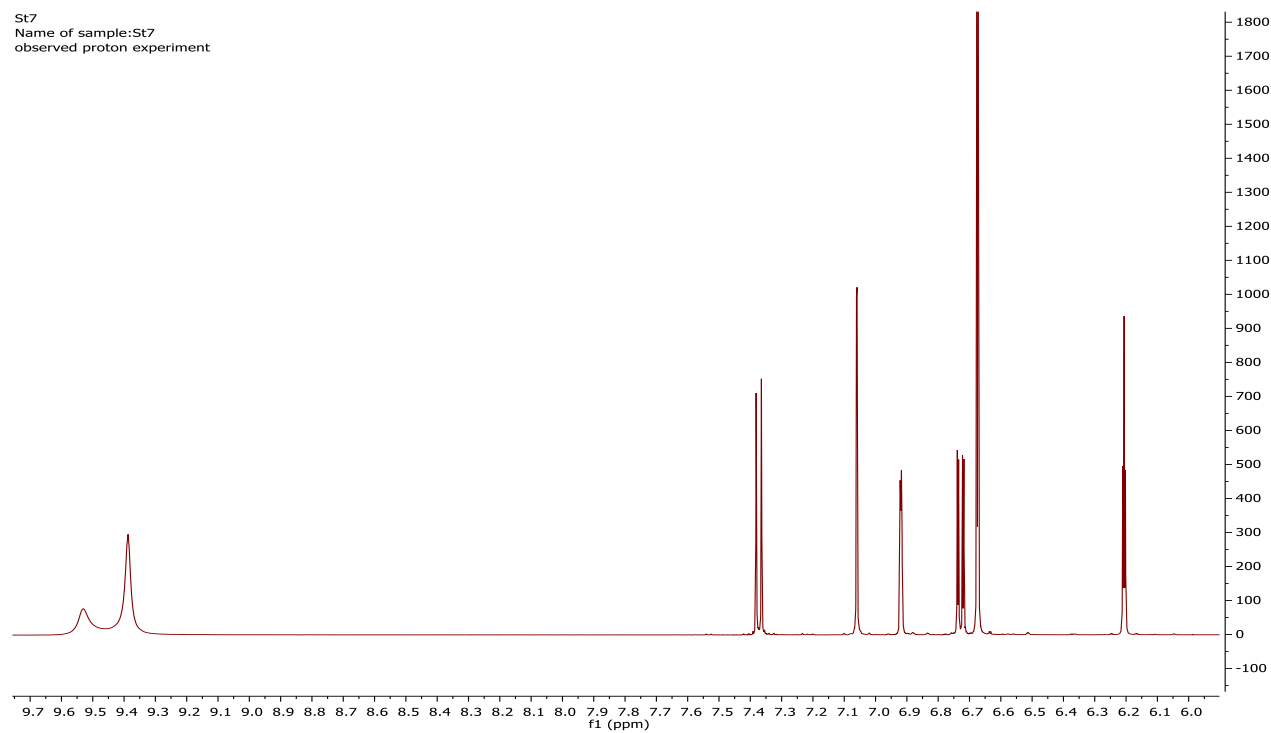

**Figure S9.**  $^1\text{H}$  NMR spectrum of moracin M

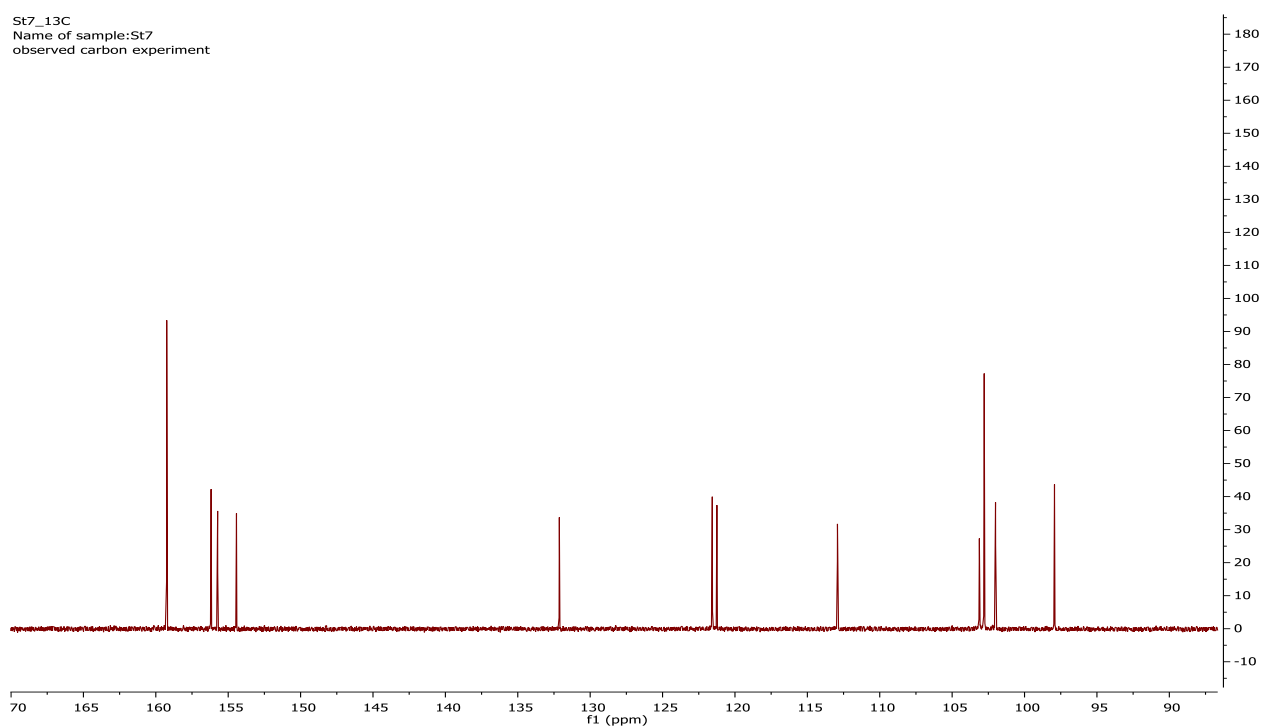

**Figure S10.**  $^{13}\text{C}$  NMR spectrum of moracin M

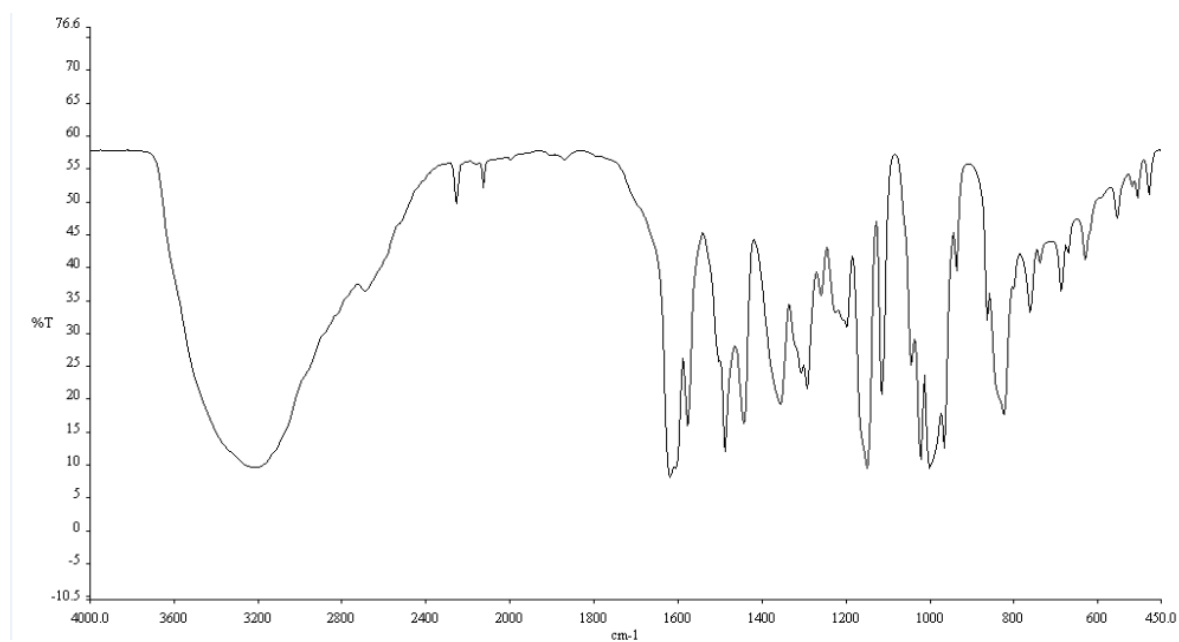

**Figure S11.** IR spectrum of moracin C (KBr disc)

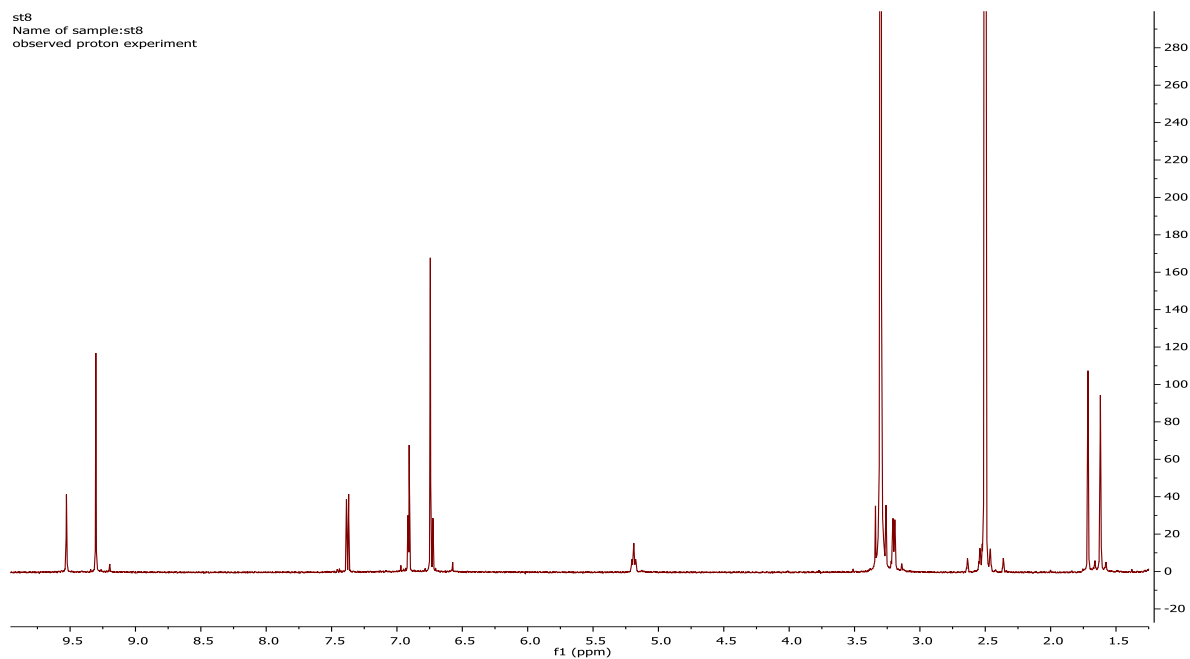

**Figure S12.**  $^1\text{H}$  NMR spectrum of moracin C

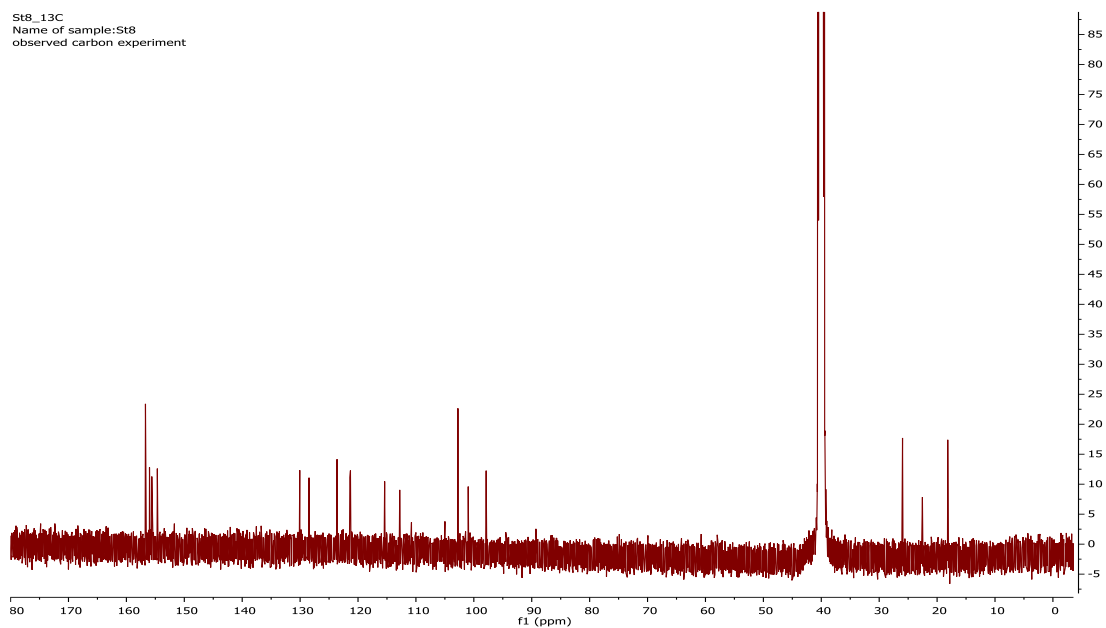

**Figure S13.**  $^{13}\text{C}$  NMR spectrum of moracin C

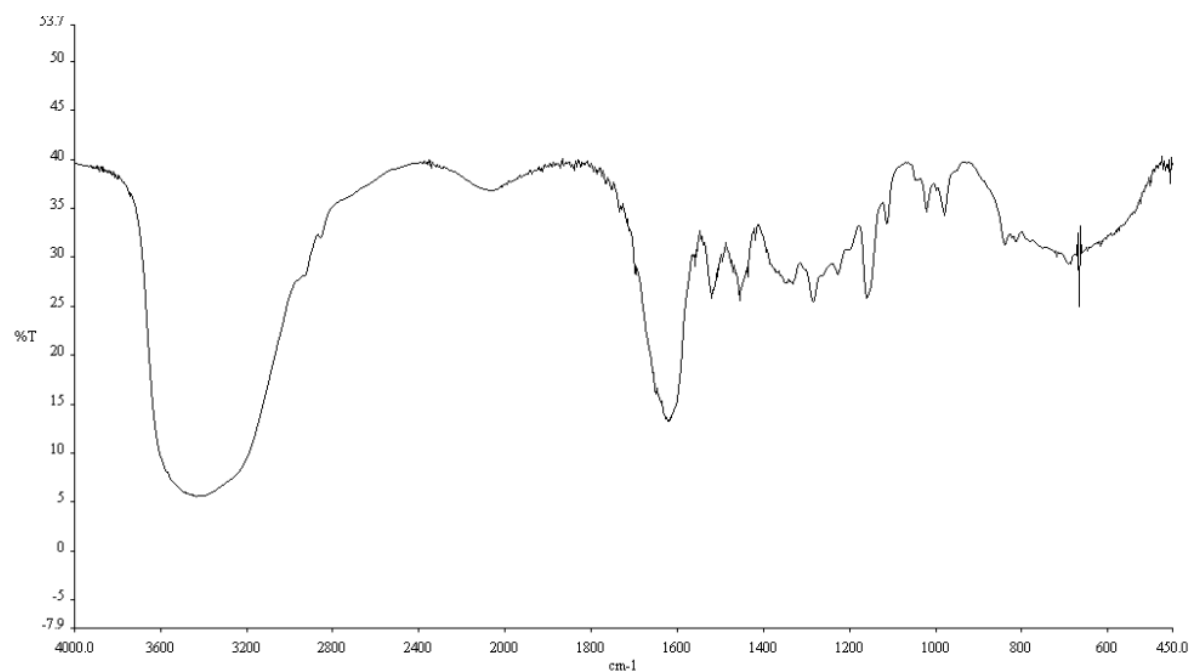

**Figure S14.** IR spectrum of 3, 4, 3', 5'-tetrahydroxybibenzyl (KBr disc)

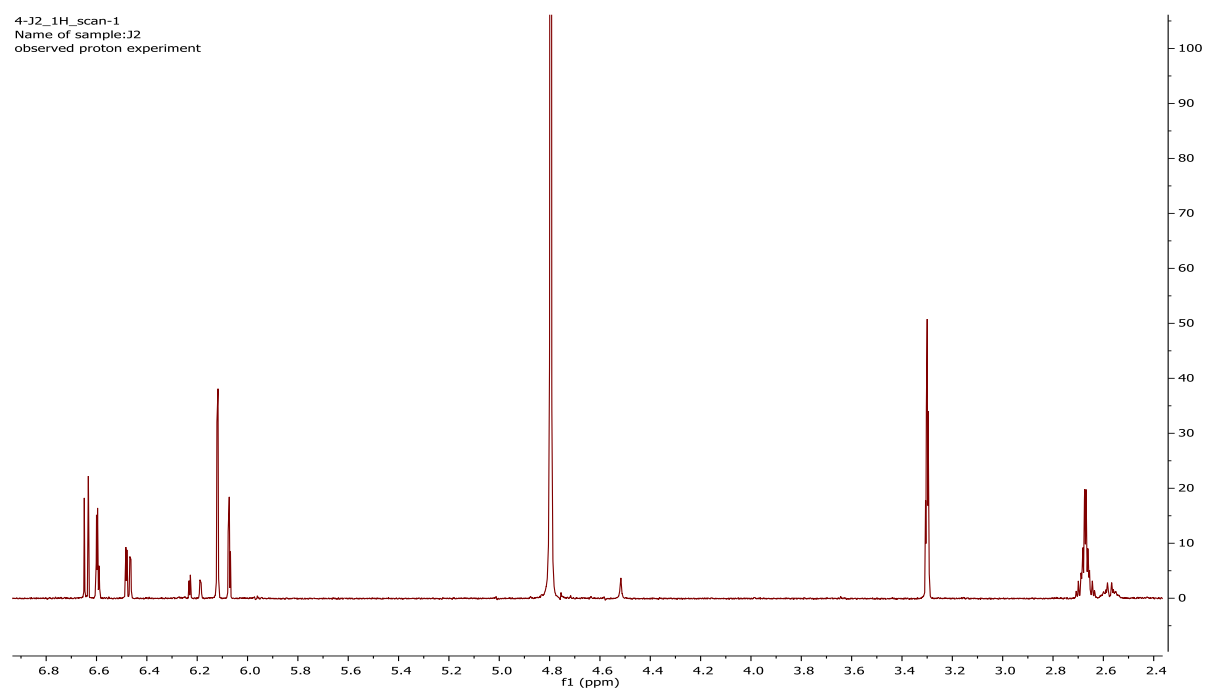

**Figure S15.** <sup>1</sup>H NMR spectrum of 3, 4, 3', 5'-tetrahydroxybibenzyl



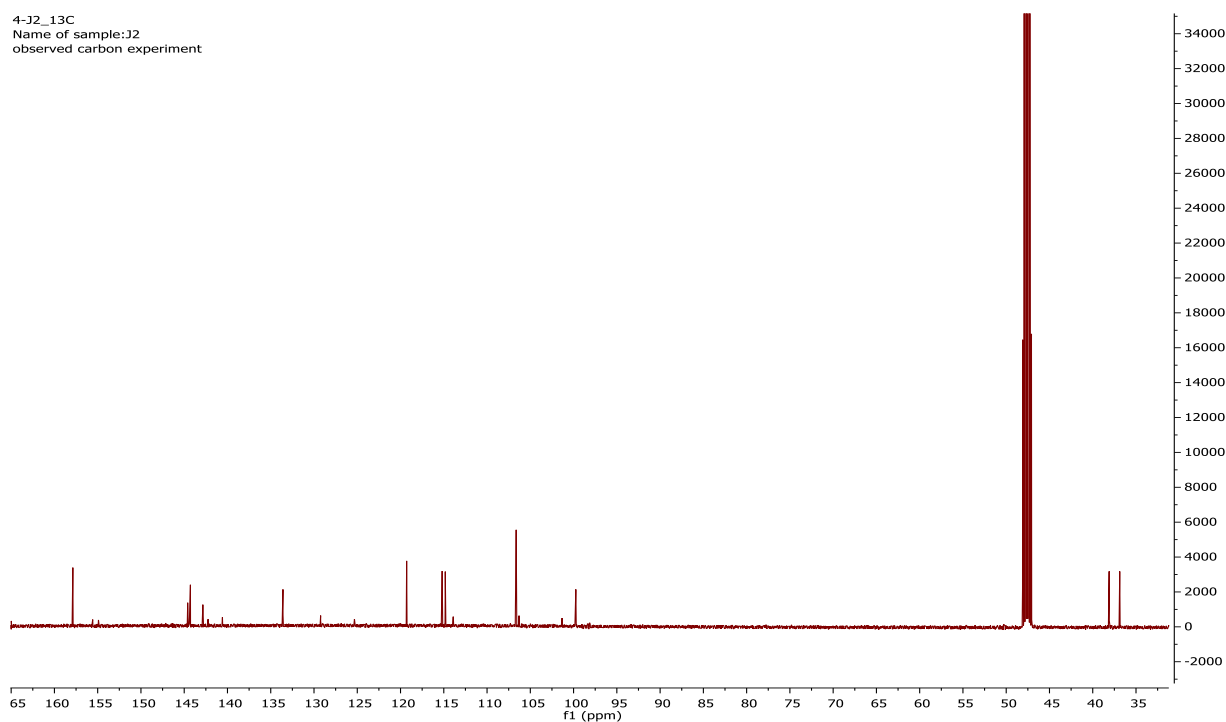

**Figure S16.**  $^{13}\text{C}$  NMR spectrum of 3, 4, 3', 5'-tetrahydroxybibenzyl

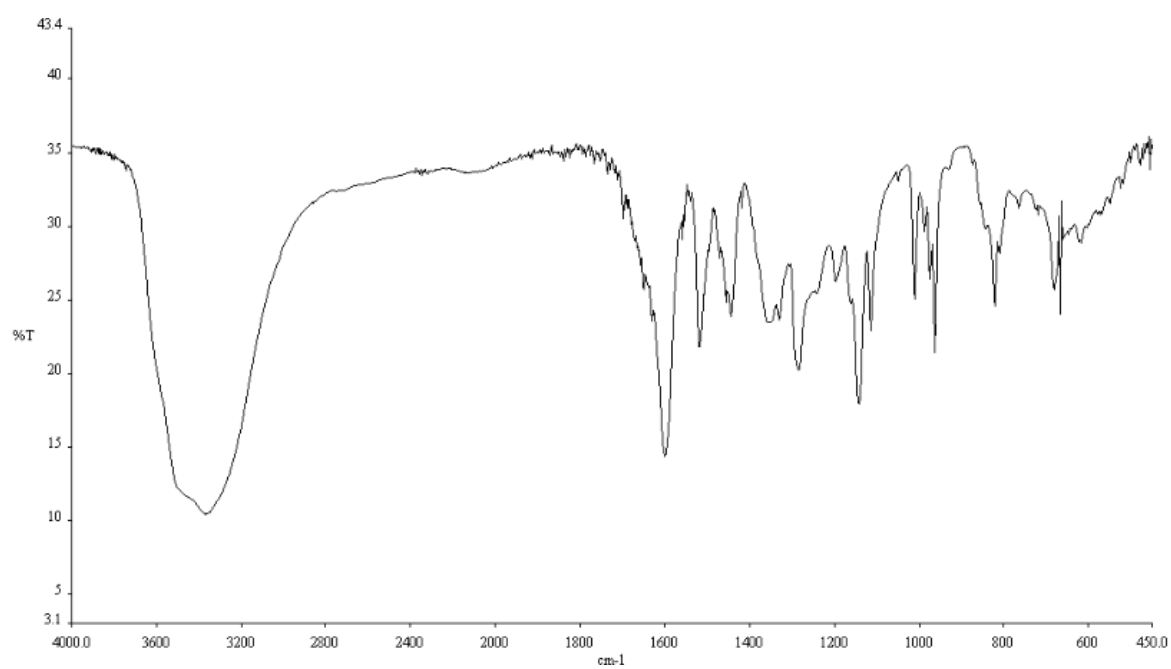

**Figure S17.** IR spectrum of piceatanol (KBr disc)

9-J3  
Name of sample:J3  
observed proton experiment

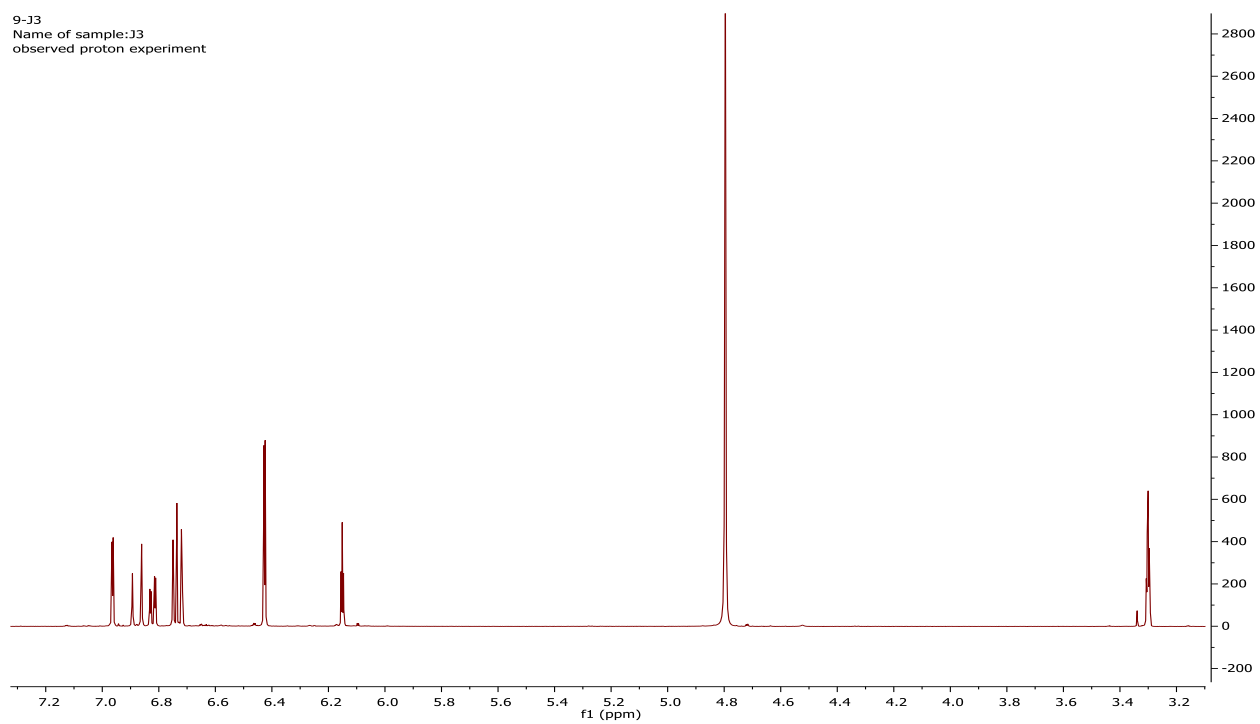

**Figure S18.**  $^1\text{H}$  NMR spectrum of piceatanol
